# Supplementary material for: Developing genomic tools to assist turnip rape [Brassica rapa (L.) subsp.oleifera (DC.) Metzg.] breeding
Source: Front Genet. 2024 Aug 28;15:1435474. doi: 10.3389/fgene.2024.1435474 (PMC11411567; doi:10.3389/fgene.2024.1435474)
Supplement: Supplementary file 1 [file Table2.XLSX]

## Sheet: Statistics_Individual_OVERALL_w
Supplementary table 2. Descriptive statistics and ANOVA results for the 9 agronomic traits of turnip rape tested at two locations.
		Traits
Environment	Statistics	DTF	PH	NS	SL	PSHR	TSW	DTM	YLD	SS
Lönnstorp	σ2G	1.20416	76.1197	24.8635	0.12824	0.084594	0.11604	3.70109	1307	-
	σ2E	0.777749	29.1259	258.45	1.47961	0.408553	0.0201596	4.99262	1706.68	-
	Mean	39.1575	81.2761	35.6148	5.68344	2.26553	2.83046	76.1941	76.054	-
	CV	2.25219	6.64014	45.1396	10.8407	28.2133	5.0163	2.93253	54.3193	-
	H	0.822845	0.886883	0.223968	0.206349	0.383163	0.94526	0.68982	0.696734	-
	P	***	***	NS	NS	***	***	***	***	-
Öjebyn	σ2G	4.94297	58.568	182.375	0.147203	0.128468	0.225581	-	-	3.16014
	σ2E	0.918976	97.9849	398.931	0.432264	0.179754	0.0461515	-	-	10.852
	Mean	32.2292	80.9679	81.2327	6.21303	2.67974	2.65308	-	-	21.464
	CV	2.97443	12.2255	24.5877	10.5821	15.8214	8.09734	-	-	15.3477
	H	0.941644	0.641985	0.578322	0.505347	0.68194	0.936157	-	-	0.466271
	P	***	***	***	***	***	***	-	-	***
	Traits:	DTF, days to flowering; PH, plant height; NS, number of silique; SL, silique length; PSHR, pod shattering resistance; TSW, thousand seed weight;
		DTM, days to maturity; YLD, yield per plot; SS, seed per seilique.
	Probability of genotypes:	*** P < 0.001; NS - Non significance.
	Variances:	σ2G, genotypic variance; σ2E, residual; CV, coefficient of variance.
	H	Repeatability
	CV	Coefficient of variance
	P	Genotype significance
