# Supplementary material for: Developing genomic tools to assist turnip rape [Brassica rapa (L.) subsp.oleifera (DC.) Metzg.] breeding
Source: Front Genet. 2024 Aug 28;15:1435474. doi: 10.3389/fgene.2024.1435474 (PMC11411567; doi:10.3389/fgene.2024.1435474)
Supplement: Supplementary file 2 [file Table3.XLSX]

## Sheet: Supplementary table 3. GWAS res
Supplementary table 3. List of identified SNPs significantly associated with the 8 studied agronomic traits across the two locations.
Location	Trait	SNP	Chr	Pos (MB)	-log10(P values)	MAF	Effect
Lönnstorp	TSW	CM020895.1_12959514	8	12.96	16.57	0.46	-0.16
Combined	DTF	CM020896.1_28000790	9	28	12.63	0.06	-1.18
Combined	TSW	CM020895.1_12959514	8	12.96	12.04	0.46	-0.1
Lönnstorp	YLD	CM020892.1_4304884	5	4.3	10.26	0.06	-41.54
Lönnstorp	DTF	CM020895.1_22855645	8	22.86	10.18	0.08	-1.08
Öjebyn	DTF	CM020896.1_28000790	9	28	10.01	0.06	-1.47
Öjebyn	TSW	CM020888.1_2486460	1	2.49	9.99	0.08	-0.27
Lönnstorp	TSW	CM020888.1_2486421	1	2.49	9.51	0.07	0.27
Öjebyn	TSW	CM020895.1_12959514	8	12.96	9.36	0.46	-0.13
Lönnstorp	DTF	CM020890.1_24534358	3	24.53	9.3	0.16	-0.62
Combined	PSHR	CM020888.1_28035981	1	28.04	9.3	0.1	0.09
Öjebyn	TSW	CM020890.1_33244505	3	33.24	9.01	0.12	0.21
Combined	TSW	CM020894.1_4615438	7	4.62	8.88	0.05	0.22
Öjebyn	DTF	CM020895.1_485831	8	0.49	8.6	0.14	1.05
Öjebyn	TSW	CM020896.1_17996283	9	18	8.43	0.05	-0.34
Lönnstorp	TSW	CM020894.1_4615438	7	4.62	8.17	0.05	0.36
Lönnstorp	PH	CM020888.1_12833890	1	12.83	7.96	0.11	-3.9
Combined	PH	CM020890.1_8712279	3	8.71	7.75	0.05	-6.44
Öjebyn	SS	CM020892.1_13138408	5	13.14	7.51	0.1	0.93
Öjebyn	DTF	CM020894.1_13558395	7	13.56	6.9	0.18	-0.87
Öjebyn	DTF	CM020897.1_2008052	10	2.01	6.88	0.11	1.23
Öjebyn	TSW	CM020890.1_3229250	3	3.23	6.86	0.07	-0.16
Combined	DTF	CM020897.1_2008052	10	2.01	6.7	0.11	0.8
Lönnstorp	DTF	CM020896.1_4076732	9	4.08	6.57	0.14	-0.46
Combined	TSW	CM020891.1_8251153	4	8.25	6.54	0.05	-0.14
Öjebyn	TSW	CM020896.1_11520382	9	11.52	6.53	0.08	0.21
Öjebyn	SS	CM020892.1_1553426	5	1.55	6.53	0.09	0.87
Lönnstorp	DTF	CM020897.1_2008052	10	2.01	6.52	0.11	0.77
Lönnstorp	PH	CM020889.1_26495220	2	26.5	6.43	0.05	-5.33
Öjebyn	TSW	CM020888.1_18777990	1	18.78	6.38	0.11	-0.19
Lönnstorp	TSW	CM020891.1_7602633	4	7.6	6.33	0.08	-0.18
Lönnstorp	PH	CM020892.1_3241028	5	3.24	6.28	0.07	-5.76
Lönnstorp	DTF	CM020889.1_26309360	2	26.31	6.14	0.07	-0.81
Öjebyn	PSHR	CM020893.1_13626556	6	13.63	6.07	0.08	0.13
Öjebyn	SL	CM020895.1_12959530	8	12.96	6.06	0.09	-0.2
Lönnstorp	DTF	CM020893.1_264085	6	0.26	5.95	0.07	0.67
Lönnstorp	TSW	CM020889.1_15523879	2	15.52	5.94	0.07	-0.21
Combined	PH	CM020896.1_20493951	9	20.49	5.82	0.06	4.25
Lönnstorp	TSW	CM020894.1_11913677	7	11.91	5.81	0.11	0.15
Öjebyn	PSHR	CM020889.1_7504527	2	7.5	5.81	0.09	0.19
Lönnstorp	PSHR	CM020889.1_52250	2	0.05	5.76	0.09	0.1
Lönnstorp	TSW	CM020892.1_6887776	5	6.89	5.75	0.14	0.14
Lönnstorp	PH	CM020888.1_10069141	1	10.07	5.74	0.08	-3.46
Combined	PSHR	CM020895.1_11728347	8	11.73	5.7	0.1	0.06
Combined	TSW	CM020890.1_33244505	3	33.24	5.69	0.12	0.11
Combined	TSW	CM020891.1_12358627	4	12.36	5.65	0.11	0.1
Öjebyn	TSW	CM020888.1_6069661	1	6.07	5.62	0.09	0.13
Lönnstorp	YLD	CM020891.1_3777324	4	3.78	5.57	0.14	-12.34
Lönnstorp	TSW	CM020890.1_8712279	3	8.71	5.56	0.05	-0.2
Lönnstorp	DTM	CM020891.1_14768191	4	14.77	5.45	0.09	-0.79
Combined	TSW	CM020889.1_246173	2	0.25	5.41	0.05	0.16
Combined	TSW	CM020894.1_16748339	7	16.75	5.41	0.08	0.1
Öjebyn	SL	CM020888.1_4641267	1	4.64	5.4	0.12	-0.2
Combined	PSHR	CM020890.1_26416338	3	26.42	5.39	0.19	0.04
Lönnstorp	DTF	CM020897.1_19798625	10	19.8	5.34	0.1	0.54
Öjebyn	TSW	CM020889.1_28700890	2	28.7	5.33	0.15	0.14
Lönnstorp	DTM	CM020894.1_12847180	7	12.85	5.3	0.15	-0.61
Lönnstorp	DTF	CM020894.1_14019976	7	14.02	5.27	0.1	0.46
Combined	DTF	CM020891.1_10419243	4	10.42	5.22	0.09	0.62
Lönnstorp	PH	CM020893.1_24475848	6	24.48	5.17	0.06	-3.01
Combined	PSHR	CM020892.1_5194280	5	5.19	5.16	0.07	0.05
Lönnstorp	PSHR	CM020890.1_26416338	3	26.42	5.13	0.19	0.08
Lönnstorp	DTM	CM020889.1_13095019	2	13.1	5.11	0.12	-0.72
Lönnstorp	PH	CM020895.1_18296173	8	18.3	5.09	0.1	-3.04
Lönnstorp	PSHR	CM020888.1_28035981	1	28.04	5.08	0.1	0.12
Öjebyn	DTF	CM020888.1_9239285	1	9.24	5.06	0.09	-0.8
Lönnstorp	YLD	CM020896.1_6511198	9	6.51	5.03	0.07	-12.37
Lönnstorp	YLD	CM020894.1_13607666	7	13.61	5.01	0.16	11.55
Combined	DTF	CM020890.1_20477743	3	20.48	4.98	0.16	-0.52
Lönnstorp	TSW	CM020893.1_3242767	6	3.24	4.97	0.08	-0.24
Combined	PH	CM020893.1_8046368	6	8.05	4.93	0.09	-3.94
Lönnstorp	PSHR	CM020896.1_23696146	9	23.7	4.85	0.18	-0.08
Combined	PSHR	CM020893.1_17094295	6	17.09	4.84	0.09	-0.05
Lönnstorp	YLD	CM020896.1_26739784	9	26.74	4.82	0.14	11.52
Lönnstorp	PH	CM020889.1_958356	2	0.96	4.8	0.11	2.63
Lönnstorp	PSHR	CM020892.1_25922312	5	25.92	4.74	0.14	-0.09
Öjebyn	TSW	CM020891.1_19922193	4	19.92	4.73	0.13	-0.2
Öjebyn	SL	CM020888.1_15632724	1	15.63	4.67	0.12	-0.13
Öjebyn	SL	CM020890.1_31815571	3	31.82	4.67	0.07	0.17
Öjebyn	TSW	CM020896.1_26305130	9	26.31	4.6	0.09	0.14
Combined	SL	CM020893.1_21273273	6	21.27	4.58	0.07	-0.18
Öjebyn	PSHR	CM020896.1_16359978	9	16.36	4.53	0.12	0.13
Öjebyn	PSHR	CM020897.1_19789125	10	19.79	4.44	0.16	0.13
Combined	TSW	CM020888.1_6414921	1	6.41	4.39	0.18	-0.08
Lönnstorp	PH	CM020897.1_20576464	10	20.58	4.39	0.07	4.34
Combined	SL	CM020896.1_43383152	9	43.38	4.38	0.07	-0.16
Combined	SL	CM020888.1_11332344	1	11.33	4.36	0.07	-0.13
Öjebyn	SS	CM020897.1_9022835	10	9.02	4.28	0.14	-0.57
Lönnstorp	TSW	CM020891.1_1177608	4	1.18	4.27	0.11	0.11
Öjebyn	PSHR	CM020890.1_37895436	3	37.9	4.17	0.13	0.11
Combined	PH	CM020893.1_3106584	6	3.11	4.16	0.08	-3.79
Lönnstorp	PSHR	CM020891.1_1070269	4	1.07	4.15	0.12	0.11
Combined	PSHR	CM020890.1_2092087	3	2.09	4.05	0.14	0.06
Öjebyn	PH	CM020895.1_8268464	8	8.27	4.03	0.11	2.46
Combined	PSHR	CM020896.1_1159166	9	1.16	4.02	0.06	0.07
DTF, days to flowering; NS, number of silique; PH, plant height; PSHR, pod shattering resistance; SL, silique length; SS, Number of seeds per silique; TSW, thousand seed weight; DTM, days to maturity; YLD, yield per plot.
