# Supplementary material for: Developing genomic tools to assist turnip rape [Brassica rapa (L.) subsp.oleifera (DC.) Metzg.] breeding
Source: Front Genet. 2024 Aug 28;15:1435474. doi: 10.3389/fgene.2024.1435474 (PMC11411567; doi:10.3389/fgene.2024.1435474)
Supplement: Supplementary file 3 [file Table4.XLSX]

## Sheet: GAPIT.Association.GWAS_Results.
Supplementary table 4. Phenotypic plasticity-based GWAS analysis and the identified marker-trait associations.
Trait	SNP	Chr	Pos	P.value	-LOG10(P.value)	MAF	FDR	Effect
TSW	CM020892.1_88384	5	88384	2.21267e-10	9.65508	0.0666667	3.10278e-07	0.502699
TSW	CM020896.1_17996283	9	17996283	2.66677e-10	9.57401	0.0515152	3.10278e-07	0.589033
TSW	CM020895.1_12959514	8	12959514	2.5431e-07	6.59464	0.457576	0.00019726	-0.151844
TSW	CM020889.1_20583125	2	20583125	8.14605e-07	6.08905	0.0939394	0.00042902	0.322337
TSW	CM020888.1_18777990	1	18777990	9.2183e-07	6.03535	0.109091	0.00042902	0.299169
TSW	CM020894.1_20102443	7	20102443	1.22625e-06	5.91142	0.0939394	0.000475579	0.21001
DTF	CM020896.1_28000790	9	28000790	3.32762e-10	9.47787	0.0636364	7.74337e-07	0.168228
DTF	CM020894.1_13977832	7	13977832	2.08584e-09	8.68072	0.0515152	2.42688e-06	-0.136036
DTF	CM020893.1_24384016	6	24384016	4.96206e-09	8.30434	0.069697	3.8489e-06	0.145187
DTF	CM020888.1_9239285	1	9239285	3.4227e-07	plasticity-based	0.0939394	0.000199115	0.104083
DTF	CM020894.1_13558395	7	13558395	5.21049e-07	6.28312	0.178788	0.000242496	0.0805505
DTF	CM020894.1_8514476	7	8514476	1.01913e-06	5.99177	0.133333	0.000395251	0.0997047
DTF	CM020897.1_2008052	10	2008052	3.95913e-06	5.4024	0.112121	0.00131613	0.125342
PH	CM020889.1_26495220	2	26495220	3.46967e-09	8.45971	0.0545455	8.07393e-06	-1.98403
PH	CM020897.1_20576464	10	20576464	1.91473e-06	5.71789	0.069697	0.00222779	1.53968
PH	CM020888.1_12833890	1	12833890	8.89719e-06	5.05075	0.109091	0.00461566	-0.849759
PH	CM020892.1_3241028	5	3241028	8.97485e-06	5.04697	0.0666667	0.00461566	-1.38773
PH	CM020889.1_21564644	2	21564644	9.91762e-06	5.00359	0.0969697	0.00461566	1.04974
PSHR	CM020889.1_7504527	2	7504527	9.92884e-08	7.0031	0.0939394	0.000231044	0.306117
PSHR	CM020896.1_23864594	9	23864594	3.24425e-05	4.48889	0.0939394	0.0377469	0.192146
SL	CM020895.1_12959530	8	12959530	6.23973e-07	6.20483	0.0878788	0.00145199	-0.3457
SL	CM020888.1_4641267	1	4641267	4.51324e-06	5.34551	0.118182	0.00525115	0.340791
SL	CM020888.1_15632724	1	15632724	1.95288e-05	4.70933	0.124242	0.0151478	-0.219982
	TSW, thousand seed weight; DTF, days to flowering; PH, plant height; PSHR, pod shattering resistance; SL, silique length.
