# Supplementary material for: Developing genomic tools to assist turnip rape [Brassica rapa (L.) subsp.oleifera (DC.) Metzg.] breeding
Source: Front Genet. 2024 Aug 28;15:1435474. doi: 10.3389/fgene.2024.1435474 (PMC11411567; doi:10.3389/fgene.2024.1435474)
Supplement: Supplementary file 4 [file Table1.XLSX]

## Sheet: Sheet1
Supplementary table 1. List of turnip rape accessions used for the current study with their type and country of origin.
Accession code	Genbank	Type	Origin	Continent	life form
CGN06838	CGN	Improved material	Bangladesh	Asia	Spring
CGN06839	CGN	Improved material	Bangladesh	Asia	Spring
CN44115	PGRC	Advanced or improved cultivar	India	Asia	Spring
CR2241	IPK	Traditional cultivar/landrace	Georgia	Asia	Spring
CN44121	PGRC	Traditional cultivar/landrace	Bangladesh	Asia	Spring
CN44122	PGRC	cultivar	India	Asia	Spring
CR2211	IPK	Traditional cultivar/landrace	Georgia	Asia	Spring
NGB2689	NordGen	Advanced or improved cultivar	Sweden	Europe	Spring
CR3396	IPK	Traditional cultivar/landrace	Tibet	Asia	Spring
CR2206	IPK	unknown	Austria	Europe	Spring
CR2269	IPK	Traditional cultivar/landrace	Italy	Europe	Spring
NGB2688	NordGen	Advanced or improved cultivar	Canada	North America	Spring
CN44107	PGRC	cultivar	India	Asia	Spring
CN44112	PGRC	cultivar	Poland	Europe	Spring
CGN06831	CGN	Improved material	unknown	Unknown	spring
CGN06836	CGN	Improved material	Bangladesh	Asia	Spring
CGN06842	CGN	Breeders variety	Canada	North America	Spring
CR1621	IPK	Advanced/improved cultivar	Canada	North America	Spring
CR2003	IPK	Advanced/improved cultivar	Canada	North America	Spring
CR2212	IPK	Traditional cultivar/Landrace	China	Asia	Spring
CR2229	IPK	Advanced/improved cultivar	Italy	Europe	Spring
CR2234	IPK	Traditional cultivar/landrace	Russian Fed	Europe	Spring
CR2300	IPK	Traditional cultivar/Landrace	Colombia	South America	Spring
CR2677	IPK	Advanced/improved cultivar	Germany	Europe	Spring
NF1833004	Jerrestad AB	Advanced or improved cultivar	Sweden	Europe	Spring
NGB2686	NordGen	Advanced or improved cultivar	Sweden	Europe	Spring
NGB13924	NordGen	Advanced or improved cultivar	Sweden	Europe	Spring
NGB13108	NordGen	Advanced or improved cultivar	Finland	Europe	Spring
NGB13518a	NordGen	Advanced or improved cultivar	Sweden	Europe	Spring
NGB13932	NordGen	Advanced or improved cultivar	Sweden	Europe	Spring
NGB13107	NordGen	Advanced or improved cultivar	Sweden	Europe	Spring
CR3425	IPK	Traditional cultivar/Landrace	Italy	Europe	Spring
CR1624	IPK	Advanced/improved cultivar	sweden	Europe	Spring
CR2209	IPK	wild	unknown	Unknown	spring
NGB23261	NordGen	Advanced or improved cultivar	Finland	Europe	Spring
CR2242	IPK	Traditional cultivar/landrace	Georgia	Asia	Spring
ACSC29	A&A Canada	cultivar	Canada	North America	Spring
CR2310	IPK	Unknown	USA	North America	spring
SC3358	Jerrestad AB	Advanced or improved cultivar	Sweden	Europe	Spring
NGB2684	NordGen	Advanced or improved cultivar	Sweden	Europe	Spring
NGB132067	NordGen	Wild	Denmark	Europe	Unknown
PI662794	NPGS	unknown	Italy	Europe	Spring
NGB132066	NordGen	wild	Denmark	Europe	Unknown
NGB13929	NordGen	Advanced or improved cultivar	Sweden	Europe	Spring
CN44123	PGRC	cultivar	India	Asia	Spring
CN44133	PGRC	cultivar	India	Asia	Spring
CN43434	PGRC	cultivar	India	Asia	Spring
CGN06841	CGN	Breeders variety	Bangladesh	Asia	Spring
CR1543	IPK	Advanced or improved cultivar	Germany	Europe	Spring
CN44128	PGRC	cultivar	China	Asia	Spring
NF1833003	Jerrestad AB	Advanced or improved cultivar	Sweden	Europe	Spring
Birta	Jerrestad AB	Advanced or improved cultivar	Sweden	Europe	Spring
SC3357	Jerrestad AB	Advanced or improved cultivar	Sweden	Europe	Spring
NGB13109	NordGen	Advanced or improved cultivar	Sweden	Europe	Spring
NGB13517	NordGen	Advanced or improved cultivar	Sweden	Europe	Spring
NGB13922	NordGen	Advanced or improved cultivar	Sweden	Europe	Spring
CN33055	PGRC	cultivar	Canada	North America	Spring
CN43433	PGRC	cultivar	India	Asia	Spring
CN44097	PGRC	cultivar	Nepal	Asia	Spring
CR3572	IPK	Traditional cultivar/Landrace	Italy	Europe	Annual
CN44102	PGRC	cultivar	India	Asia	Spring
CN44103	PGRC	cultivar	Pakistan	Asia	Spring
CN44110	PGRC	cultivar	Pakistan	Asia	Spring
CN44114	PGRC	Advanced or improved cultivar	Turkey	Europe	Spring
CN44117	PGRC	Advanced or improved cultivar	India	Asia	spring
CGN06837	CGN	Improved material	Bangladesh	Asia	Spring
CR1622	IPK	Advanced/improved cultivar	Sweden	Europe	Spring
CR2006	IPK	advanced/improved cultivar	Sweden	Europe	Spring
CR2010	IPK	Advanced/improved cultivar	Sweden	Europe	Spring
CR2011	IPK	Advanced/improved cultivar	Sweden	Europe	Spring
CR2208	IPK	Traditional cultivar/landrace	USA	North America	Spring
CR2228	IPK	Advanced/improved cultivar	India	Asia	Spring
CR2355	IPK	Advanced/improved cultivar	Italy	Europe	Spring
CR2357	IPK	Advanced/improved cultivar	Portugal	Europe	Spring
CR2879	IPK	unknown	Germany	Europe	spring
NF1833009	Jerrestad AB	Advanced or improved cultivar	Sweden	Europe	Spring
NF1833011	Jerrestad AB	Advanced or improved cultivar	Sweden	Europe	Spring
NF1833008	Jerrestad AB	Advanced or improved cultivar	Sweden	Europe	Spring
SC3359	Jerrestad AB	Advanced or improved cultivar	Sweden	Europe	Spring
Boel	Jerrestad AB	Advanced or improved cultivar	Sweden	Europe	Spring
NF1833002	Jerrestad AB	Advanced or improved cultivar	Sweden	Europe	Spring
NGB13923	NordGen	Advanced or improved cultivar	Sweden	Europe	Spring
NGB13931	NordGen	Advanced or improved cultivar	Sweden	Europe	Spring
NGB13928	NordGen	Advanced or improved cultivar	Sweden	Europe	Spring
NGB13926	NordGen	Advanced or improved cultivar	Sweden	Europe	Spring
NGB10649	NordGen	Advanced or improved cultivar	Finland	Europe	Spring
NGB13898	NordGen	Advanced or improved cultivar	Sweden	Europe	Spring
NGB13925	NordGen	Advanced or improved cultivar	Sweden	Europe	spring
NGB10651	NordGen	Advanced or improved cultivar	Finland	Europe	spring
NGB11929	NordGen	Advanced or improved cultivar	Finland	Europe	Spring
CR1564	IPK	Advanced/improved cultivar	Germany	Europe	Spring
NGB2687	NordGen	Advanced or improved cultivar	Sweden	Europe	Spring
CN35994	PGRC	Advanced or improved cultivar	China	Asia	Spring
CN43432	PGRC	Advanced or improved cultivar	India	Asia	Spring
CN44096	PGRC	cultivar	India	Asia	Spring
CN44099	PGRC	cultivar	India	Asia	Spring
CR1619	IPK	Advanced/improved cultivar	Germany	Europe	Spring
CR1628	IPK	Advanced/improved cultivar	Germany	Europe	Spring
CR2204	IPK	Traditional cultivar/landrace	Italy	Europe	Annual
CN44119	PGRC	cultivar	Pakistan	Asia	Spring
CN44124	PGRC	cultivar	India	Asia	Spring
CN44132	PGRC	Advanced or improved cultivar	China	Asia	Spring
CGN06832	CGN	wild	USA	North America	Spring
CR1021	IPK	Advanced or improved cultivar	Canada	North America	Spring
CR1507	IPK	Advanced/improved cultivar	Germany	Europe	Spring
CR1529	IPK	Advanced/improved cultivar	Germany	Europe	Spring
CR1594	IPK	advanced/improved cultivar	Germany	Europe	Spring
CR1606	IPK	Advanced/improved cultivar	Australia	Oceania	Spring
CR1607	IPK	advanced/improved cultivar	canada	North America	Spring
CR1617	IPK	Advanced/improved cultivar	Germany	Europe	Spring
CR1630	IPK	Advanced/improved cultivar	Sweden	Europe	Spring
CR2007	IPK	Advanced/improved cultivar	Sweden	Europe	Spring
CR2008	IPK	Advanced/improved cultivar	Sweden	Europe	Spring
CR2009	IPK	advanced/improved cultivar	Sweden	Europe	Spring
CR2299	IPK	Traditional cultivar/landrace	Colombia	South America	Spring
CR2551	IPK	Unknown	Italy	Europe	Spring
CR3166	IPK	Advanced/improved cultivar	Finland	Europe	Spring
CR2205	IPK	Traditional cultivar/landrace	Italy	Europe	Spring
SC3360	Jerrestad AB	Advanced or improved cultivar	Sweden	Europe	Spring
NGB2331	NordGen	Breeding/research material	Finland	Europe	spring
NGB2685	NordGen	Advanced or improved cultivar	Sweden	Europe	spring
CN44106	PGRC	cultivar	Iran	Asia	Spring
CN44131	PGRC	Advanced or improved cultivar	China	Asia	Spring
CR1470	IPK	Advanced/improved cultivar	Sweden	Europe	Spring
CR2253	IPK	Traditional cultivar/landrace	Italy	Europe	Spring
CR2298	IPK	Traditional cultivar/landrace	Italy	Europe	Spring
ACSC18	A&A Canada	cultivar	Canada	North America	Spring
NGB13106	NordGen	Advanced or improved cultivar	Sweden	Europe	Spring
NGB13930	NordGen	Advanced or improved cultivar	Sweden	Europe	Spring
CN44098	PGRC	cultivar	India	Asia	Spring
CN44120	PGRC	Advanced or improved cultivar	China	Asia	Spring
CN44127	PGRC	cultivar	India	Asia	Spring
CR1505	IPK	Advanced/improved cultivar	Sweden	Europe	Annual
CR1024	IPK	Advanced/improved cultivar	sweden	Europe	Spring
CR1623	IPK	Advanced/improved cultivar	Sweden	Europe	Spring
CR2333	IPK	Traditional cultivar/landrace	UK	Europe	spring
CR2296	IPK	Traditional cultivar/Landrace	Italy	Europe	Spring
PI687054	NPGS	unknown	Spain	Europe	Annual
SC3356	Jerrestad AB	Advanced or improved cultivar	Sweden	Europe	Spring
NGB2683	NordGen	Advanced or improved cultivar	Sweden	Europe	Spring
NGB10650	NordGen	Advanced or improved cultivar	Finland	Europe	Spring
CN31402	PGRC	Advanced or improved cultivar	Canada	North America	Spring
CN33052	PGRC	Advanced or improved cultivar	Canada	North America	Spring
CN44101	PGRC	cultivar	Sweden	Europe	Spring
CN44126	PGRC	cultivar	Bangladesh	Asia	Spring
CN44129	PGRC	Advanced or improved cultivar	China	Asia	Spring
CR1478	IPK	advanced/improved cultivar	USA	North America	Annual
CR3498	IPK	Traditional cultivar/landrace	Italy	Europe	Annual
CR3499	IPK	Traditional cultivar/Landrace	Italy	Europe	Annual
CR1480	IPK	Advanced or improved cultivar	Canada	North America	Spring
CR1538	IPK	Traditional cultivar/Landrace	Slovakia	Europe	Spring
CR1563	IPK	advanced/improved cultivar	Germany	Europe	Spring
CR1578	IPK	wild	Slovakia	Europe	Spring
CR2207	IPK	unknown	unknown	Unknown	spring
CR2231	IPK	Traditional cultivar/landrace	Cuba	North America	Spring
CR2306	IPK	Traditional cultivar/Landrace	Italy	Europe	Spring
CR2318	IPK	Traditional cultivar/landrace	Italy	Europe	Spring
CR3315	IPK	Traditional cultivar/landrace	Italy	Europe	Spring
PI633168	NPGS	Cultivar	Italy	Europe	Spring
CR1469	IPK	Advanced/improved cultivar	Germany	Europe	Spring
CN44116	PGRC	cultivar	China	Asia	Spring
CN44125	PGRC	cultivar	China	Asia	Spring
CR3509	IPK	Traditional cultivar/landrace	Italy	Europe	Annual
CR3573	IPK	Semi-natural/wild	Italy	Europe	Annual
CR2203	IPK	Traditional cultivar/landrace	Italy	Europe	Spring
CR2213	IPK	Traditional cultivar/landrace	Austria	Europe	Spring
NGB23263	NordGen	Advanced or improved cultivar	Sweden	Europe	Spring
CR2297	IPK	Traditional cultivar/landrace	Italy	Europe	Spring
PI430488	NPGS	Cultivar	China	Asia	spring
PI687065	NPGS	Cultivar	India	Asia	Annual
